# Supplementary material
Source: Springer Nature journal article supplement (https://www.springermedizin.de/resource/supplementary/12889_2010_3240_MOESM4_ESM.pdf/9488622)

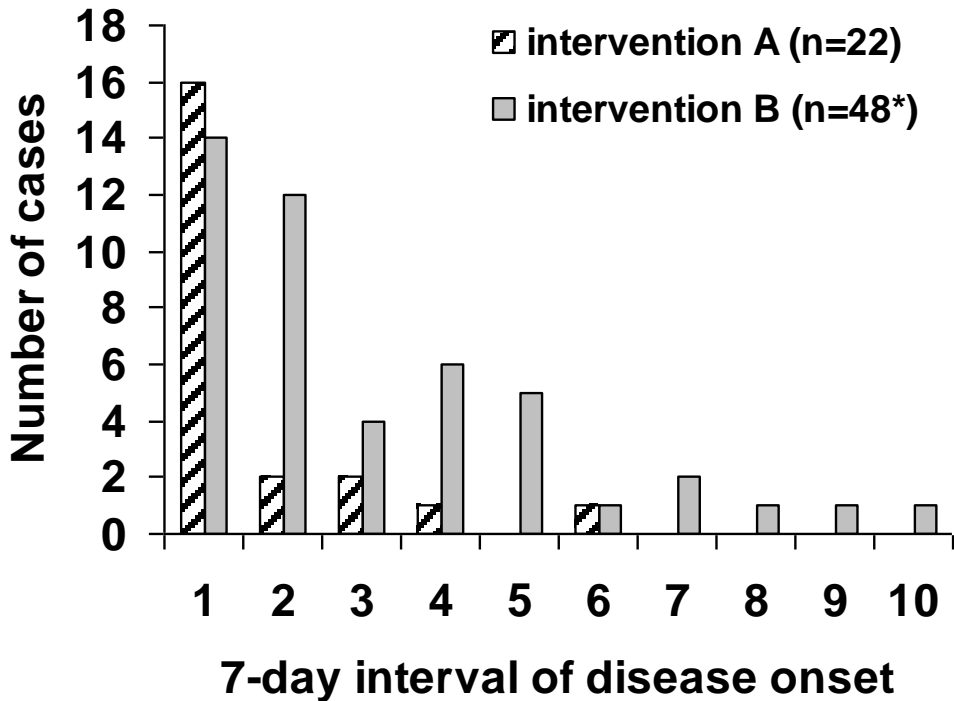

\* 1 case not shown due to missing date of disease onset

Supplement: MOESM4 [file 9488622]
